# Supplementary material for: Difference in the Effect of Applying Bacillus to Control Tomato Verticillium Wilt in Black and Red Soil
Source: MDPI journal article supplement (doi:10.3390/microorganisms12040797), 2024-04-15
Supplement: s1 [file s1]

# **Difference in the Effect of Applying *Bacillus* to Control Tomato Verticillium Wilt in Black and Red Soil**

Authors:

Zhenhua Guo<sup>a, #</sup>, Ziyu Lu<sup>a, #</sup>, Zhongwang Liu<sup>a</sup>, Wei Zhou<sup>a</sup>, Shuangyu Yang<sup>a</sup>, Jiayan Lv<sup>a</sup>, Mi Wei<sup>a, \*</sup>

Affiliations:

<sup>a</sup> School of Agriculture, Shenzhen Campus, Sun Yat-Sen University, Shenzhen 518107, China.

<sup>#</sup> Zhenhua Guo and Ziyu Lu contributed equally to this article.

Contact information of co-author(s):

Zhenhua Guo, e-mail: 15546100532@163.com; Ziyu Lu, e-mail: luzu5@mail2.sysu.edu.cn; Zhongwang Liu, wangzhongliu668@163.com; Wei Zhou, zhouw79@mail2.sysu.edu.cn; Shuangyu Yang, ysy251147@163.com; Jiayan Lv, lvjy28@mail2.sysu.edu.cn; Mi Wei, e-mail: weim29@mail.sysu.edu.cn.

\* Correspondence

ORCID: 0000-0002-5761-3970

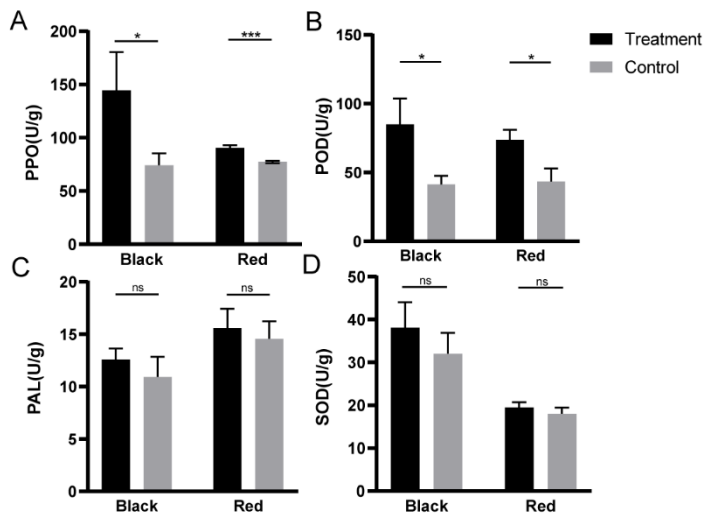

**Figure S1.** Effects of *Bacillus* on tomato resistance-related enzymes in black and red soils. (A) Polyphenol oxidase (PPO), (B) peroxidase (POD), (C) phenylalanine ammonia lyase (PAL), (D) superoxide dismutase (SOD).

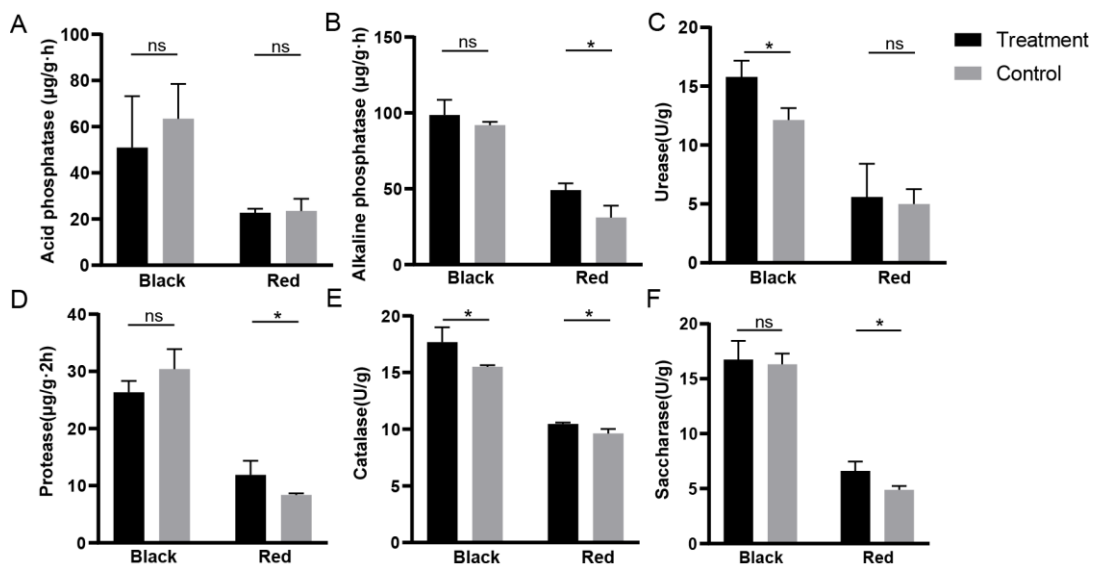

**Figure S2.** Effects of *Bacillus* on enzyme activities in soils with nutrient differences.

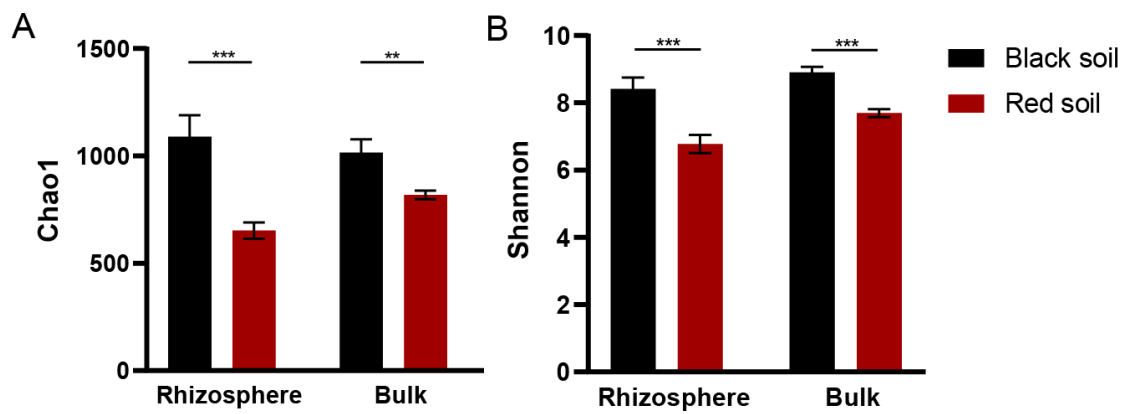

**Figure S3.** *Alpha* diversity of bacterial community in tomato roots in soil with nutrient differences.

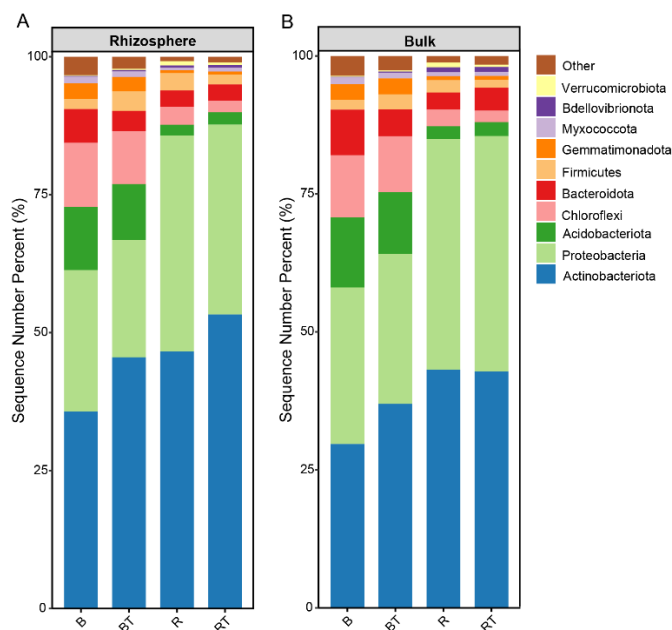

**Figure S4.** The percentage of bacteria microbial community composition at the phylum level in tomato rhizosphere and bulk soil under different treatments.

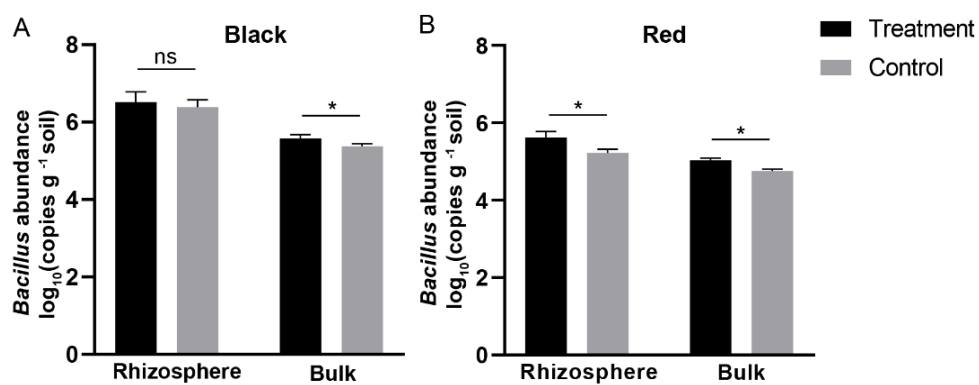

**Figure S5.** qPCR quantification of the genus *Bacillus* in the rhizosphere and non-rhizosphere of black and red soils under different treatments.

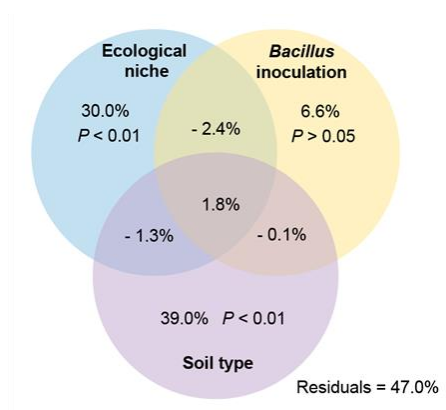

**Figure S6.** Effects of soil type, ecological niche, and exogenous *Bacillus* on root bacterial community of tomato.

**Table S1.** Basic physical and chemical properties of black and red soils.

|                                         | Black soil | Red soil |
|-----------------------------------------|------------|----------|
| TN (mg/kg)                              | 1392.33    | 212      |
| TP (mg/kg)                              | 745.33     | 364      |
| TK (g/kg)                               | 5.77       | 8.59     |
| SOM (g/kg)                              | 8.17       | 8.15     |
| AP (mg/kg)                              | 25.18      | 3.21     |
| AK (mg/kg)                              | 256.51     | 105.77   |
| NH <sub>4</sub> <sup>+</sup> -N (mg/kg) | 1.54       | 1.04     |
| NO <sub>3</sub> <sup>-</sup> -N (mg/kg) | 87.2       | 2.07     |

**Table S2.** Evaluation of growth-promoting ability and biofilm formation ability of different microbial combinations.

| Combination/<br>isolate | Inorganic<br>phosphate | Organic<br>phosphate | Nitrogen<br>fixation | Potassium<br>solubilization | IAA<br>production | Biofilm<br>formation |
|-------------------------|------------------------|----------------------|----------------------|-----------------------------|-------------------|----------------------|
| Combination A           | +++                    | ++                   | ++                   | +++                         | +++               | +++                  |
| Combination B           | ++                     | ++                   | ++                   | ++                          | ++                | ++                   |
| Combination C           | +                      | ++                   | +++                  | ++                          | ++                | ++                   |
| D2                      | ++                     | -                    | +                    | +++                         | ++                |                      |
| ZJ-11                   | ++                     | ++                   | +++                  | -                           | ++                |                      |
| A#                      | +                      | +++                  | ++                   | -                           | +++               |                      |
| B#                      | +                      | +++                  | +++                  | -                           | +++               |                      |
| 2#                      | +                      | +++                  | +++                  | -                           | +++               |                      |
| 13-2                    | +++                    | -                    | -                    | +++                         | ++                |                      |

Note: Combination A: D2+ZJ-11+13-2+A#; Combination B: B#+13-2+2#; Combination C: A#+B#+13-2+2#.

**Table S3.** Global network properties of bacteria molecular ecological networks among different treatments.

|           |            | BTR | BR  | BTB | BB  | RTR | RR  | RTB | RB  |
|-----------|------------|-----|-----|-----|-----|-----|-----|-----|-----|
| Empirical | Total node | 615 | 766 | 545 | 691 | 433 | 370 | 506 | 418 |

|          |                                                 |                 |                 |                 |                 |                 |                 |                 |                 |
|----------|-------------------------------------------------|-----------------|-----------------|-----------------|-----------------|-----------------|-----------------|-----------------|-----------------|
| networks | Total links                                     | 3906            | 7336            | 3472            | 8356            | 2119            | 1163            | 1823            | 1802            |
|          | Avg degree<br>(avgK)                            | 12.702          | 19.154          | 12.741          | 24.185          | 9.788           | 6.286           | 7.206           | 8.622           |
|          | Connectedness<br>(Con)                          | 0.795           | 0.787           | 0.702           | 0.700           | 0.76            | 0.731           | 0.664           | 0.836           |
|          | Density                                         | 0.021           | 0.025           | 0.023           | 0.035           | 0.023           | 0.017           | 0.014           | 0.021           |
|          | Module                                          | 31              | 42              | 41              | 49              | 24              | 27              | 48              | 22              |
|          | Average<br>clustering<br>coefficient<br>(avgCC) | 0.376           | 0.354           | 0.325           | 0.315           | 0.353           | 0.197           | 0.193           | 0.277           |
|          | Average path<br>distance (GD)                   | 4.934           | 5.349           | 6.443           | 7.312           | 6.134           | 6.641           | 6.528           | 5.663           |
|          | Modularity                                      | 0.661           | 0.479           | 0.693           | 0.319           | 0.673           | 0.747           | 0.802           | 0.798           |
|          | Average<br>clustering<br>coefficient<br>(avgCC) | 0.093±<br>0.004 | 0.163±<br>0.005 | 0.085±<br>0.005 | 0.251±<br>0.007 | 0.082±<br>0.006 | 0.051±<br>0.006 | 0.043±<br>0.005 | 0.042±<br>0.004 |
|          | Random                                          |                 |                 |                 |                 |                 |                 |                 |                 |
| networks | Average path<br>distance (GD)                   | 2.881±<br>0.015 | 2.733±<br>0.015 | 2.906±<br>0.018 | 2.685±<br>0.017 | 2.974±<br>0.019 | 3.336±<br>0.032 | 3.334±<br>0.026 | 3.071±<br>0.019 |
|          | Modularity                                      | 0.213±<br>0.003 | 0.154±<br>0.003 | 0.212±<br>0.004 | 0.115±<br>0.002 | 0.255±<br>0.004 | 0.351±<br>0.005 | 0.321±<br>0.004 | 0.293±<br>0.004 |
|          | Average<br>clustering<br>coefficient<br>(avgCC) | <0.0001         |                 | <0.0001         |                 | <0.0001         |                 | <0.0001         |                 |
|          | Average path<br>distance (GD)                   | <0.0001         |                 | <0.0001         |                 | <0.0001         |                 | <0.0001         |                 |
|          | P                                               |                 |                 |                 |                 |                 |                 |                 |                 |
